# Supplementary material for: Metavariables Resuming Host Immune Features and Nodal Involvement Are Associated with Oncological Outcomes in Oral Cavity Squamous Cell Carcinoma
Source: MDPI journal article supplement (doi:10.3390/cells10092203), 2021-08-26
Supplement: s1 [file s1]

# **Metavariables Resuming Host Immune Features and Nodal Involvement Are Associated with Oncological Outcomes in Oral Cavity Squamous Cell Carcinoma**

Francesco Missale,<sup>1,2\*</sup> Mattia Bugatti,<sup>3</sup> Davide Mattavelli,<sup>4</sup> Silvia Lonardi,<sup>3</sup> Davide Lombardi,<sup>4</sup> Piero Nicolai,<sup>5</sup> Cesare Piazza,<sup>4</sup> Simonetta Battocchio,<sup>3</sup> Anna Bozzola,<sup>3</sup> Stefano Calza<sup>6,7,8</sup> and William Vermi<sup>1,3,9\*</sup>

<sup>1</sup> Department of Molecular and Translational Medicine, University of Brescia, 25125 Brescia, Italy

<sup>2</sup> Department of Head & Neck Oncology & Surgery Otorhinolaryngology, Antoni Van Leeuwenhoek, Nederlands Kanker Instituut, 1066 Amsterdam, The Netherlands

<sup>3</sup> Unit of Pathology, ASST Spedali Civili di Brescia, 25100 Brescia, Italy

<sup>4</sup> Unit of Otorhinolaryngology—Head and Neck Surgery, Department of Medical and Surgical Specialties, Radiological Sciences, and Public Health, University of Brescia, 25123 Brescia, Italy

<sup>5</sup> Section of Otorhinolaryngology—Head and Neck Surgery, Department of Neurosciences, University of Padua, Via Giustiniani, 2-35128 Padua, Italy;

<sup>6</sup> Unit of Biostatistics, Department of Molecular and Translational Medicine, University of Brescia, 25125 Brescia, Italy

<sup>7</sup> Department of Medical Epidemiology and Biostatistics, Karolinska Institutet, 17177 Stockholm, Sweden

<sup>8</sup> Big & Open Data Innovation Laboratory, University of Brescia, 25125 Brescia, Italy

<sup>9</sup> Department of Pathology and Immunology, Washington University School of Medicine, St. Louis, MO 63130, USA

**\*Correspondence to: Francesco Missale and William Vermi**

Department of Molecular and Translational Medicine, University of Brescia,

Viale Europa, 11; 25123, Brescia, Italy

**Email:** f.missale@unibs.it; william.vermi@unibs.it

## Supplementary Material

### Supplementary Figures

**Supplementary Figure S1:** Heatmap showing the missingness data in the whole cohort (**A**); intersection plot of missing data (**B**).

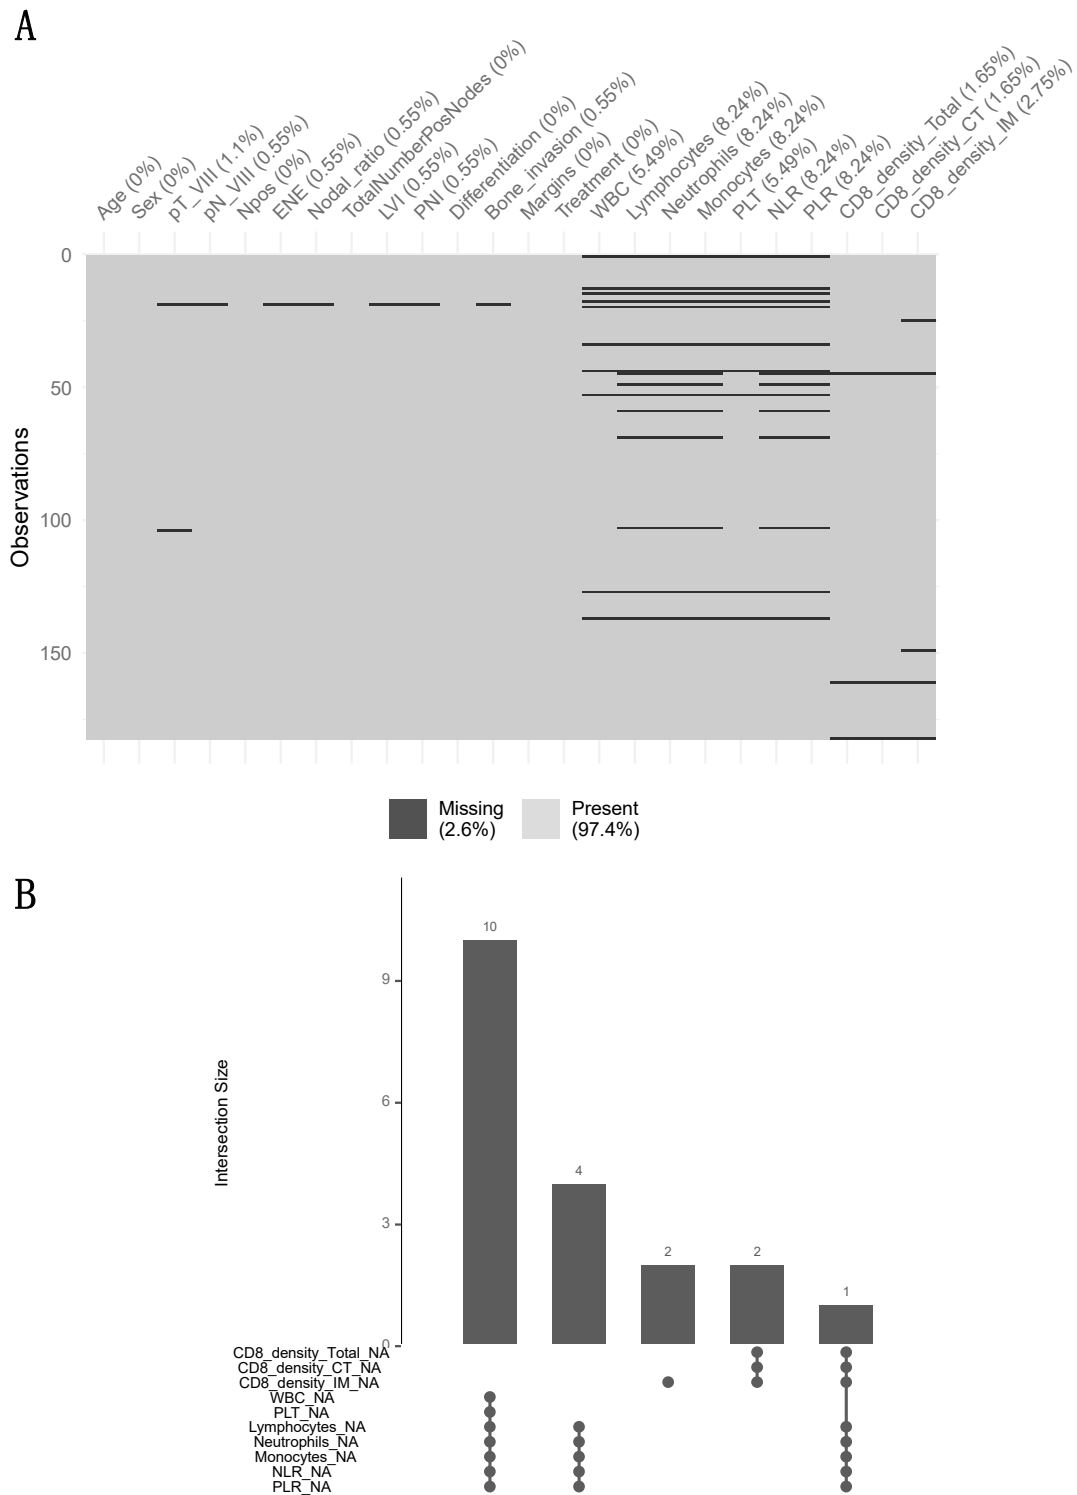

**Supplementary Figure S2:** Scatter plots showing the relationship between TI-CD8<sup>MV</sup> and the variables from which it is defined. P values are estimated by Spearman correlation test.

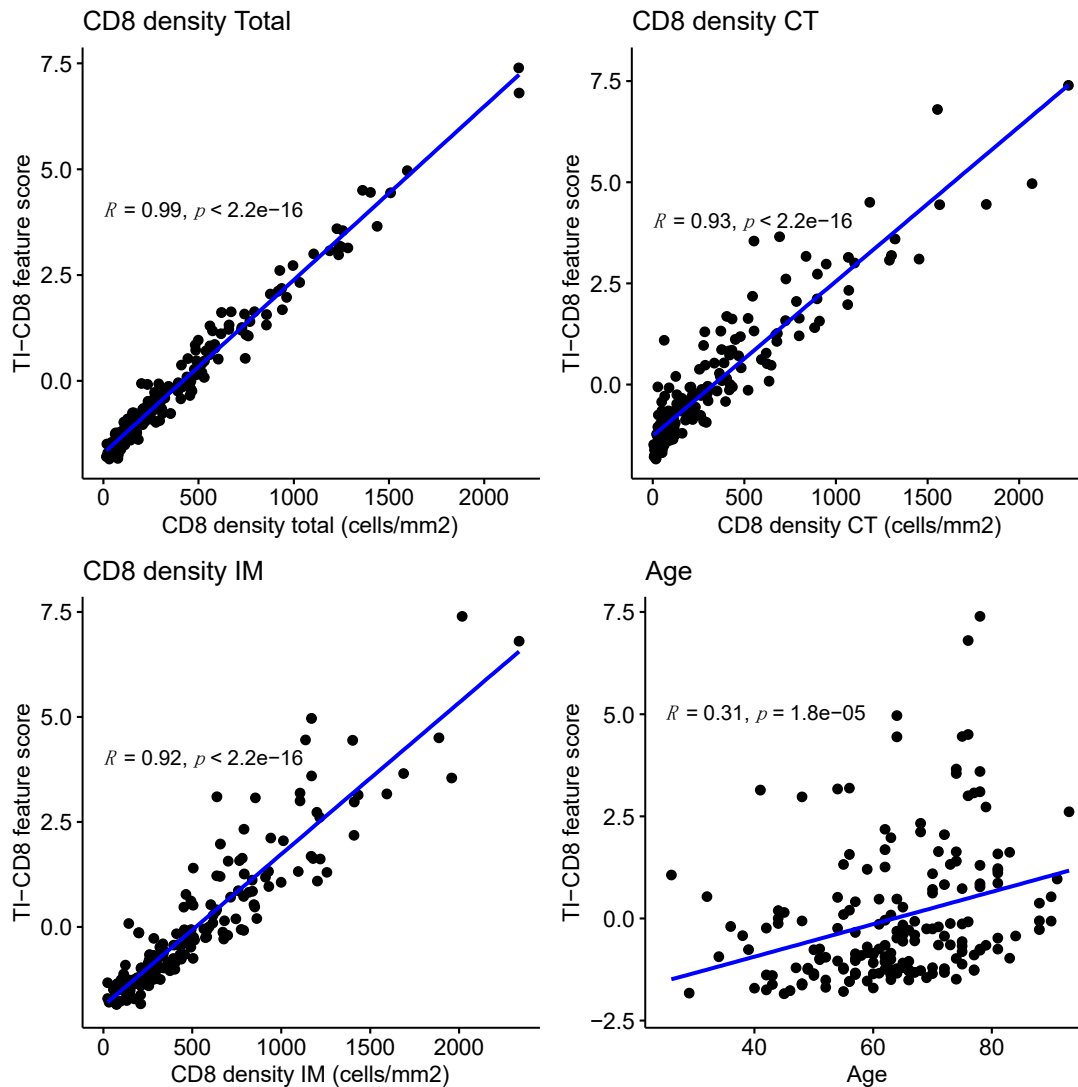

**Supplementary Figure S3:** Box plots and scatter plots showing the relationship between the NODAL<sup>MV</sup> and the variables from which it is defined. P values are estimated by Kruskal-Wallis test, Wilcoxon sign-rank test or Spearman correlation test.

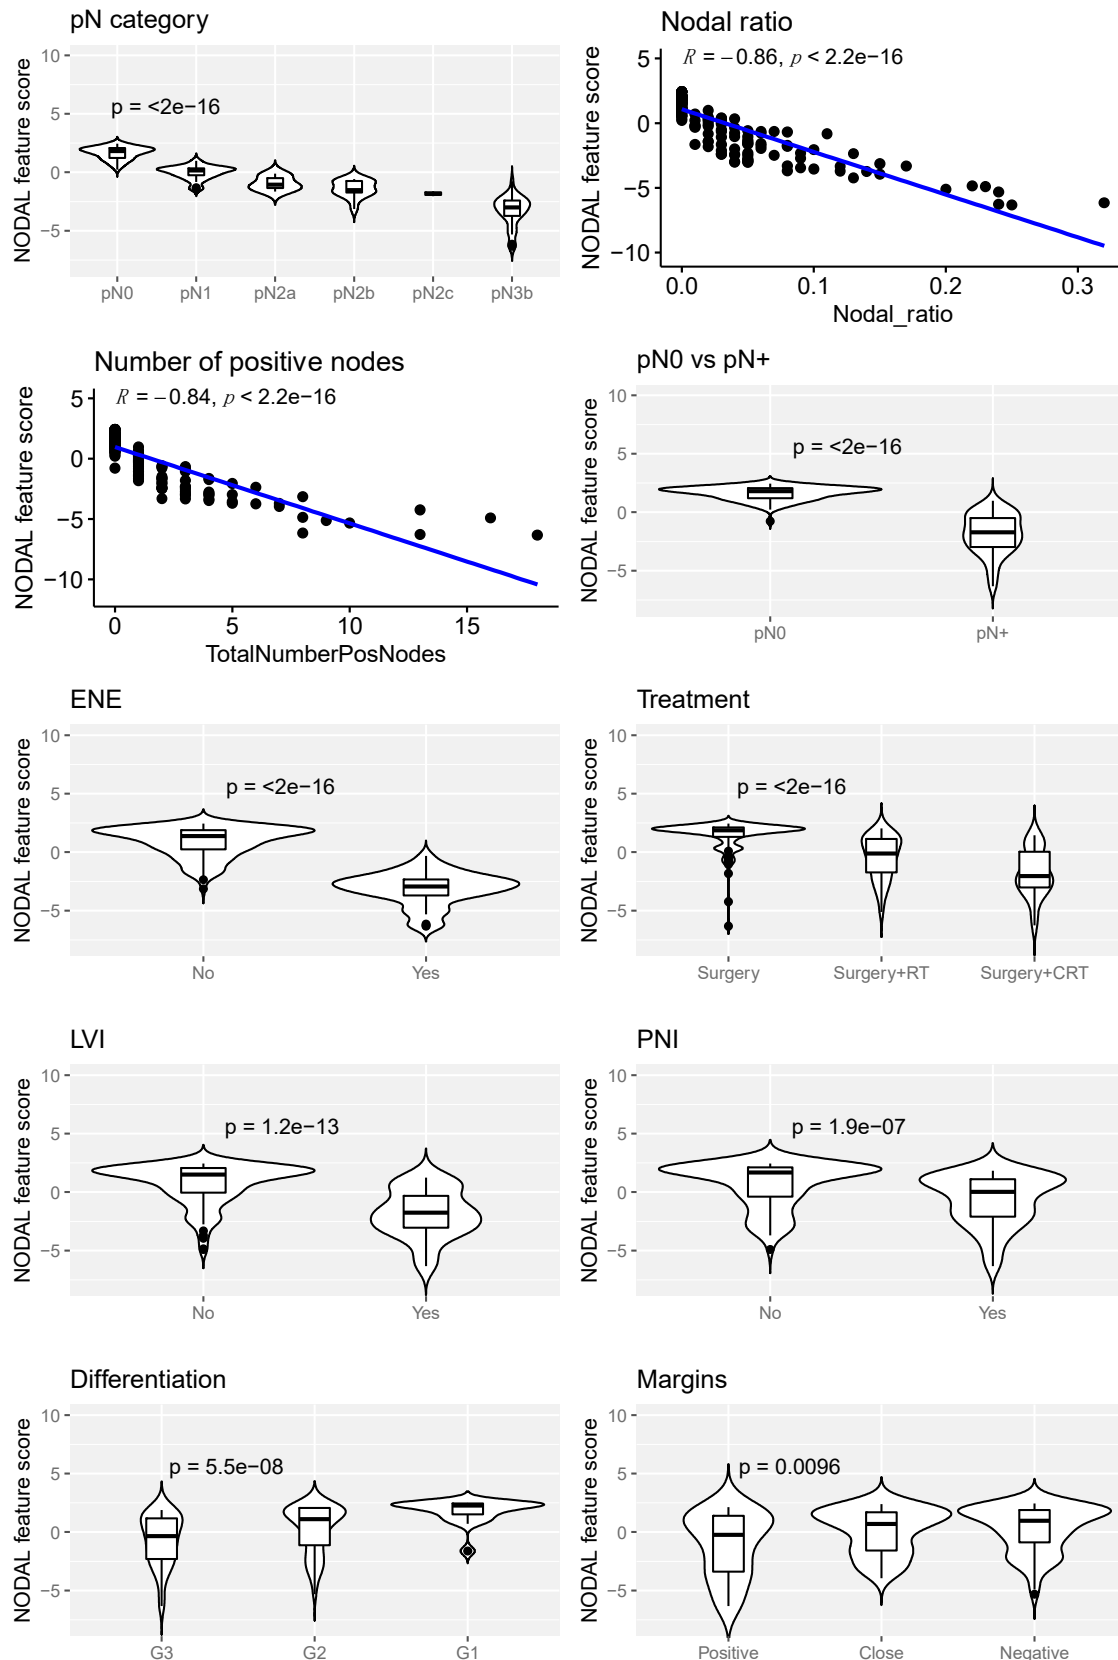

**Supplementary Figure S4:** Scatter plots and box plots showing the relationship between the MYELOID<sup>MV</sup> and the variables from which it is defined. P values are estimated by the Spearman correlation test or Wilcoxon sign-rank test.

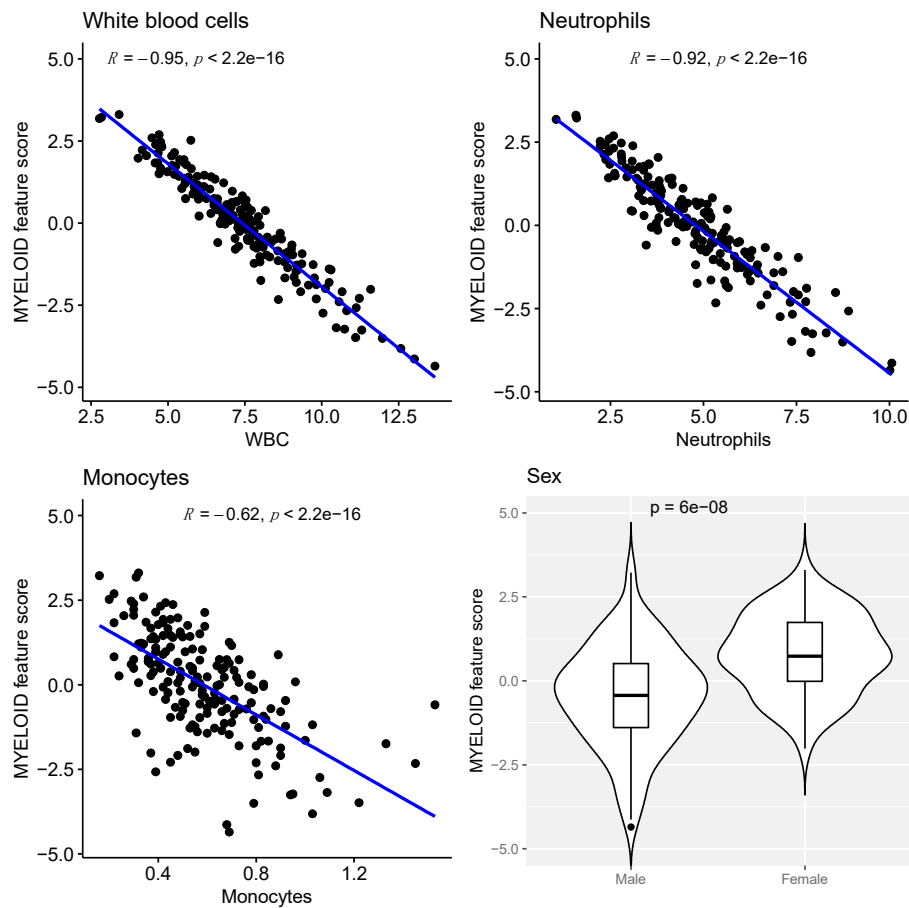

**Supplementary Figure S5:** Scatter plots showing the relationship between the LYMPHOID<sup>MV</sup> and the variables from which it is defined. P values are estimated by Spearman correlation test.

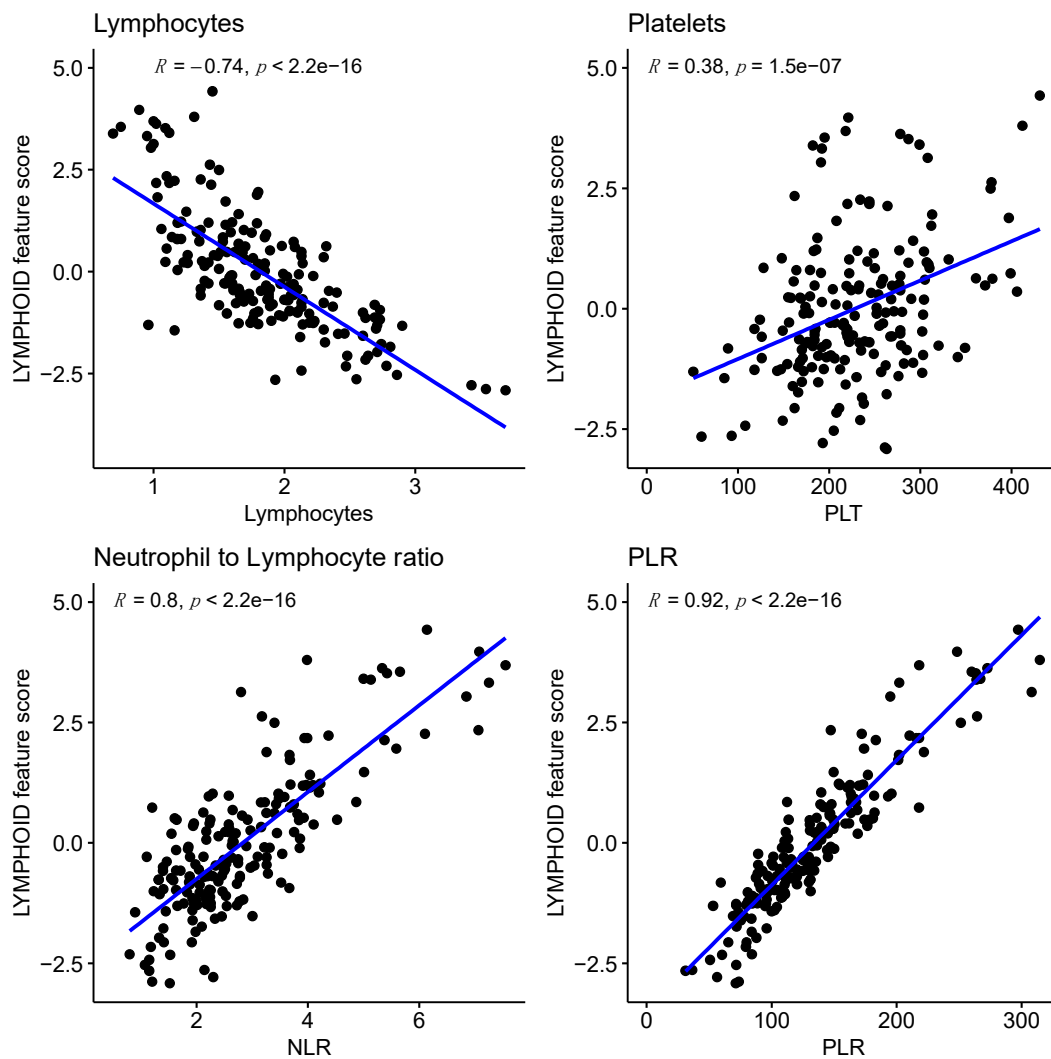

**Supplementary Figure S6:** Box plots showing the relationship between the TUMOR<sup>MV</sup> and the variables from which it is defined. P values are estimated by Kruskal-Wallis test.

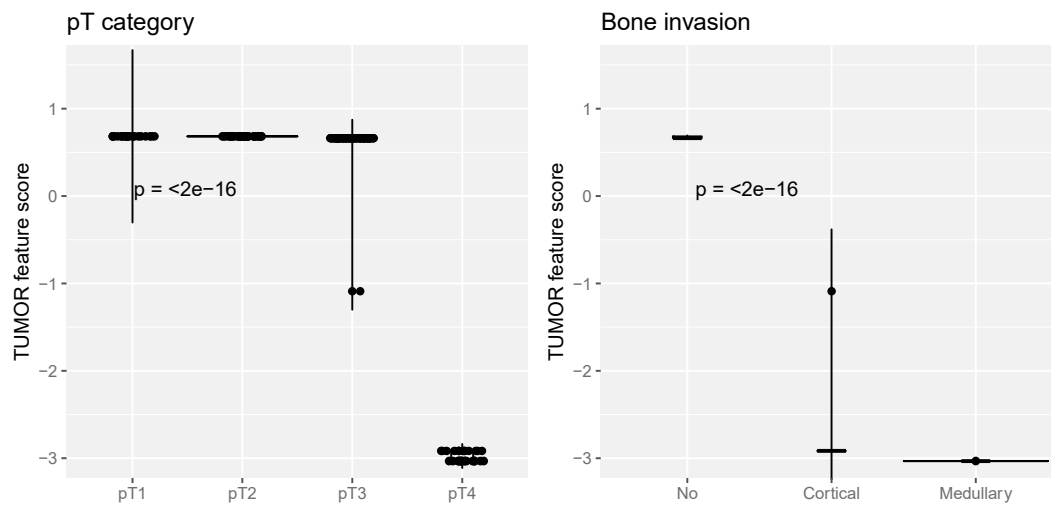

## Supplementary Tables

**Supplementary Table S1:** R values of the Spearman's correlation analysis between continuous variables analyzed. Legend: \*\*\*\*,  $p < 0.0001$ ; \*\*\*,  $p < 0.001$ ; \*\*,  $p < 0.01$ ; \*,  $p < 0.05$ .

|                   | Age    | Nodal Ratio | N° Positive Nodes | WBC      | Lymphocytes | Neutrophils | Monocytes | PLT      | NLR      | PLR   | TOTCD8 density | CTCD8 density |
|-------------------|--------|-------------|-------------------|----------|-------------|-------------|-----------|----------|----------|-------|----------------|---------------|
| Age               |        |             |                   |          |             |             |           |          |          |       |                |               |
| Nodal Ratio       | -0.03  |             |                   |          |             |             |           |          |          |       |                |               |
| N° Positive Nodes | -0.04  | 0.98****    |                   |          |             |             |           |          |          |       |                |               |
| WBC               | -0.19* | -0.01       | 0.01              |          |             |             |           |          |          |       |                |               |
| Lymphocytes       | -0.16* | -0.04       | -0.01             | 0.41**** |             |             |           |          |          |       |                |               |
| Neutrophils       | -0.17* | 0.00        | 0.02              | 0.94**** | 0.15*       |             |           |          |          |       |                |               |
| Monocytes         | 0.02   | 0.01        | 0.05              | 0.51**** | 0.20**      | 0.37****    |           |          |          |       |                |               |
| PLT               | -0.09  | -0.06       | -0.04             | 0.30**** | 0.26***     | 0.26***     | 0.16*     |          |          |       |                |               |
| NLR               | -0.03  | 0.03        | 0.03              | 0.48**** | -0.52****   | 0.71****    | 0.16*     | 0.03     |          |       |                |               |
| PLR               | 0.05   | -0.04       | -0.05             | -0.07    | -0.57****   | 0.12        | -0.03     | 0.57**** | 0.49**** |       |                |               |
| TOTCD8 density    | 0.22** | 0.11        | 0.11              | -0.02    | 0.06        | -0.04       | -0.10     | 0.02     | -0.07    | -0.04 |                |               |
| CTCD8 density     | 0.21** | 0.20**      | 0.20**            | -0.02    | 0.05        | -0.04       | -0.11     | 0.03     | -0.04    | -0.03 | 0.92****       |               |
| IMCD8 density     | 0.24** | 0.01        | 0.01              | -0.06    | -0.01       | -0.08       | -0.10     | -0.04    | -0.06    | -0.02 | 0.92****       | 0.78****      |



**Supplementary Table S2:** Association analysis between peripheral or intratumoral biomarkers measures and Sex. P values estimated by Wilcoxon test.

|                                                    | Male<br>(N=115)     | Female<br>(N=67)    | P-value |
|----------------------------------------------------|---------------------|---------------------|---------|
| <b>WBC (10<sup>9</sup>/L)</b>                      |                     |                     |         |
| Mean (SD)                                          | 7.75 (2.05)         | 6.84 (1.60)         | 0.002   |
| Median [Min, Max]                                  | 7.65 [2.77, 13.7]   | 6.91 [3.41, 11.6]   |         |
| <b>Lymphocytes (10<sup>9</sup>/L)</b>              |                     |                     |         |
| Mean (SD)                                          | 1.82 (0.587)        | 1.81 (0.438)        | 0.881   |
| Median [Min, Max]                                  | 1.80 [0.690, 3.69]  | 1.76 [1.00, 2.78]   |         |
| <b>Neutrophils (10<sup>9</sup>/L)</b>              |                     |                     |         |
| Mean (SD)                                          | 5.07 (1.70)         | 4.31 (1.42)         | 0.002   |
| Median [Min, Max]                                  | 4.97 [1.04, 10.1]   | 4.15 [1.57, 8.55]   |         |
| <b>Monocytes (10<sup>9</sup>/L)</b>                |                     |                     |         |
| Mean (SD)                                          | 0.613 (0.234)       | 0.535 (0.219)       | 0.018   |
| Median [Min, Max]                                  | 0.580 [0.160, 1.45] | 0.490 [0.200, 1.53] |         |
| <b>PLT (10<sup>9</sup>/L)</b>                      |                     |                     |         |
| Mean (SD)                                          | 219 (68.0)          | 243 (67.4)          | 0.015   |
| Median [Min, Max]                                  | 215 [51.0, 431]     | 242 [60.0, 412]     |         |
| <b>NLR (10<sup>9</sup>/L)</b>                      |                     |                     |         |
| Mean (SD)                                          | 3.02 (1.40)         | 2.50 (1.07)         | 0.015   |
| Median [Min, Max]                                  | 2.65 [0.897, 7.25]  | 2.26 [0.799, 7.55]  |         |
| <b>PLR (10<sup>9</sup>/L)</b>                      |                     |                     |         |
| Mean (SD)                                          | 130 (56.1)          | 140 (46.0)          | 0.057   |
| Median [Min, Max]                                  | 113 [36.5, 308]     | 132 [31.1, 315]     |         |
| <b><sup>TOT</sup>CD8 density (/mm<sup>2</sup>)</b> |                     |                     |         |
| Mean (SD)                                          | 385 (352)           | 473 (477)           | 0.237   |
| Median [Min, Max]                                  | 244 [16.4, 1440]    | 290 [42.2, 2180]    |         |
| <b><sup>CT</sup>CD8 density (/mm<sup>2</sup>)</b>  |                     |                     |         |
| Mean (SD)                                          | 297 (338)           | 395 (500)           | 0.316   |
| Median [Min, Max]                                  | 132 [5.13, 1820]    | 213 [9.96, 2270]    |         |
| <b><sup>IM</sup>CD8 density (/mm<sup>2</sup>)</b>  |                     |                     |         |
| Mean (SD)                                          | 500 (417)           | 554 (448)           | 0.288   |
| Median [Min, Max]                                  | 361 [23.6, 1960]    | 437 [79.6, 2340]    |         |

**Supplementary Table S3:** Association analysis between peripheral or intratumoral biomarkers measures and pT category. P values estimated by Kruskal-Wallis test.

|                                                    | pT1<br>(N=23)       | pT2<br>(N=41)       | pT3<br>(N=85)       | pT4<br>(N=33)       | P-value |
|----------------------------------------------------|---------------------|---------------------|---------------------|---------------------|---------|
| <b>WBC (10<sup>9</sup>/L)</b>                      |                     |                     |                     |                     |         |
| Mean (SD)                                          | 7.83 (2.52)         | 7.11 (1.54)         | 7.46 (1.98)         | 7.38 (1.85)         | 0.701   |
| Median [Min, Max]                                  | 7.59 [3.41, 12.6]   | 6.99 [4.30, 11.1]   | 7.47 [2.77, 13.7]   | 7.17 [4.67, 13.0]   |         |
| <b>Lymphocytes (10<sup>9</sup>/L)</b>              |                     |                     |                     |                     |         |
| Mean (SD)                                          | 2.01 (0.681)        | 1.73 (0.480)        | 1.83 (0.562)        | 1.76 (0.382)        | 0.245   |
| Median [Min, Max]                                  | 2.02 [0.690, 3.43]  | 1.65 [0.980, 2.70]  | 1.79 [0.750, 3.69]  | 1.69 [1.03, 2.71]   |         |
| <b>Neutrophils (10<sup>9</sup>/L)</b>              |                     |                     |                     |                     |         |
| Mean (SD)                                          | 5.06 (1.98)         | 4.55 (1.29)         | 4.82 (1.69)         | 4.83 (1.70)         | 0.745   |
| Median [Min, Max]                                  | 5.11 [1.57, 8.74]   | 4.75 [2.22, 7.77]   | 4.72 [1.04, 10.0]   | 4.46 [2.48, 10.1]   |         |
| <b>Monocytes (10<sup>9</sup>/L)</b>                |                     |                     |                     |                     |         |
| Mean (SD)                                          | 0.579 (0.200)       | 0.603 (0.272)       | 0.584 (0.209)       | 0.568 (0.257)       | 0.88    |
| Median [Min, Max]                                  | 0.510 [0.220, 1.03] | 0.520 [0.290, 1.45] | 0.590 [0.160, 1.33] | 0.540 [0.220, 1.53] |         |
| <b>PLT (10<sup>9</sup>/L)</b>                      |                     |                     |                     |                     |         |
| Mean (SD)                                          | 230 (56.7)          | 224 (68.7)          | 220 (62.9)          | 253 (84.9)          | 0.243   |
| Median [Min, Max]                                  | 217 [108, 349]      | 208 [60.0, 399]     | 220 [51.0, 431]     | 233 [89.0, 412]     |         |
| <b>NLR (10<sup>9</sup>/L)</b>                      |                     |                     |                     |                     |         |
| Mean (SD)                                          | 2.77 (1.51)         | 2.88 (1.38)         | 2.83 (1.31)         | 2.81 (1.10)         | 0.927   |
| Median [Min, Max]                                  | 2.34 [1.11, 7.08]   | 2.51 [1.15, 7.06]   | 2.59 [0.799, 7.55]  | 2.65 [1.23, 5.59]   |         |
| <b>PLR (10<sup>9</sup>/L)</b>                      |                     |                     |                     |                     |         |
| Mean (SD)                                          | 130 (61.2)          | 139 (54.5)          | 128 (49.2)          | 145 (52.5)          | 0.181   |
| Median [Min, Max]                                  | 116 [50.7, 264]     | 130 [31.1, 308]     | 120 [36.5, 297]     | 138 [59.3, 315]     |         |
| <b><sup>TOT</sup>CD8 density (/mm<sup>2</sup>)</b> |                     |                     |                     |                     |         |
| Mean (SD)                                          | 341 (353)           | 496 (449)           | 411 (383)           | 392 (427)           | 0.315   |
| Median [Min, Max]                                  | 207 [61.8, 1250]    | 339 [22.2, 2180]    | 281 [16.4, 1600]    | 290 [31.0, 2180]    |         |
| <b><sup>CT</sup>CD8 density (/mm<sup>2</sup>)</b>  |                     |                     |                     |                     |         |
| Mean (SD)                                          | 199 (275)           | 367 (410)           | 347 (419)           | 349 (443)           | 0.104   |
| Median [Min, Max]                                  | 72.2 [9.09, 947]    | 215 [21.9, 1570]    | 173 [5.13, 2070]    | 208 [17.5, 2270]    |         |
| <b><sup>IM</sup>CD8 density (/mm<sup>2</sup>)</b>  |                     |                     |                     |                     |         |
| Mean (SD)                                          | 442 (419)           | 637 (470)           | 494 (386)           | 496 (477)           | 0.117   |
| Median [Min, Max]                                  | 288 [96.9, 1590]    | 489 [23.6, 2340]    | 396 [23.6, 1960]    | 393 [56.3, 2020]    |         |

**Supplementary Table S4:** Association analysis between peripheral or intratumoral biomarkers measures and pN category. P values estimated by Kruskal-Wallis test.

|                                                    | pN0<br>(N=96)       | pN1<br>(N=24)       | pN2a<br>(N=6)        | pN2b<br>(N=16)       | pN2c<br>(N=2)        | pN3b<br>(N=38)      | P-<br>value |
|----------------------------------------------------|---------------------|---------------------|----------------------|----------------------|----------------------|---------------------|-------------|
| <b>WBC (10<sup>9</sup>/L)</b>                      |                     |                     |                      |                      |                      |                     |             |
| Mean (SD)                                          | 7.56 (2.02)         | 6.88 (1.77)         | 6.30 (1.82)          | 6.70 (1.60)          | 9.70 (2.27)          | 7.73 (1.83)         | 0.099       |
| Median [Min, Max]                                  | 7.39 [3.41, 13.0]   | 6.90 [2.77, 10.7]   | 6.78 [2.84, 7.88]    | 7.30 [4.16, 9.82]    | 9.70 [8.09, 11.3]    | 7.80 [4.03, 13.7]   |             |
| <b>Lymphocytes (10<sup>9</sup>/L)</b>              |                     |                     |                      |                      |                      |                     |             |
| Mean (SD)                                          | 1.84 (0.556)        | 1.85 (0.402)        | 1.54 (0.667)         | 1.60 (0.464)         | 2.06 (0.0283)        | 1.87 (0.566)        | 0.299       |
| Median [Min, Max]                                  | 1.79 [0.750, 3.54]  | 1.88 [1.12, 2.70]   | 1.50 [0.890, 2.74]   | 1.61 [0.690, 2.37]   | 2.06 [2.04, 2.08]    | 1.79 [1.02, 3.69]   |             |
| <b>Neutrophils (10<sup>9</sup>/L)</b>              |                     |                     |                      |                      |                      |                     |             |
| Mean (SD)                                          | 4.91 (1.74)         | 4.23 (1.40)         | 4.07 (1.54)          | 4.37 (1.28)          | 6.44 (2.11)          | 5.05 (1.57)         | 0.173       |
| Median [Min, Max]                                  | 4.81 [1.57, 10.1]   | 4.29 [1.04, 7.55]   | 4.20 [1.59, 6.30]    | 4.59 [2.22, 7.33]    | 6.44 [4.94, 7.93]    | 5.22 [2.32, 10.0]   |             |
| <b>Monocytes (10<sup>9</sup>/L)</b>                |                     |                     |                      |                      |                      |                     |             |
| Mean (SD)                                          | 0.590 (0.263)       | 0.606 (0.204)       | 0.532 (0.193)        | 0.483 (0.193)        | 0.835 (0.148)        | 0.595 (0.165)       | 0.14        |
| Median [Min, Max]                                  | 0.535 [0.200, 1.53] | 0.610 [0.220, 1.03] | 0.605 [0.160, 0.670] | 0.450 [0.220, 0.920] | 0.835 [0.730, 0.940] | 0.580 [0.300, 1.06] |             |
| <b>PLT (10<sup>9</sup>/L)</b>                      |                     |                     |                      |                      |                      |                     |             |
| Mean (SD)                                          | 231 (66.2)          | 227 (72.7)          | 211 (114)            | 232 (92.2)           | 304 (1.41)           | 218 (52.5)          | 0.53        |
| Median [Min, Max]                                  | 222 [89.0, 431]     | 219 [85.0, 379]     | 227 [51.0, 378]      | 198 [60.0, 412]      | 304 [303, 305]       | 220 [118, 312]      |             |
| <b>NLR (10<sup>9</sup>/L)</b>                      |                     |                     |                      |                      |                      |                     |             |
| Mean (SD)                                          | 2.90 (1.41)         | 2.28 (0.715)        | 3.07 (2.08)          | 2.94 (1.11)          | 2.61 (1.70)          | 2.94 (1.23)         | 0.391       |
| Median [Min, Max]                                  | 2.53 [0.799, 7.55]  | 2.19 [0.897, 3.94]  | 2.55 [1.41, 7.08]    | 2.73 [1.15, 5.13]    | 2.61 [1.41, 3.81]    | 2.67 [1.07, 7.06]   |             |
| <b>PLR (10<sup>9</sup>/L)</b>                      |                     |                     |                      |                      |                      |                     |             |
| Mean (SD)                                          | 134 (48.6)          | 125 (37.6)          | 147 (90.7)           | 159 (79.0)           | 122 (35.4)           | 126 (50.2)          | 0.621       |
| Median [Min, Max]                                  | 130 [50.7, 297]     | 126 [36.5, 218]     | 123 [53.1, 264]      | 148 [31.1, 315]      | 122 [96.6, 147]      | 112 [65.3, 273]     |             |
| <b><sup>TOT</sup>CD8 density (/mm<sup>2</sup>)</b> |                     |                     |                      |                      |                      |                     |             |
| Mean (SD)                                          | 393 (400)           | 481 (506)           | 375 (374)            | 507 (424)            | 383 (102)            | 412 (353)           | 0.881       |
| Median [Min, Max]                                  | 253 [16.4, 2180]    | 289 [71.7, 2180]    | 262 [70.1, 1100]     | 374 [49.7, 1360]     | 383 [310, 455]       | 331 [22.2, 1440]    |             |
| <b><sup>CT</sup>CD8 density (/mm<sup>2</sup>)</b>  |                     |                     |                      |                      |                      |                     |             |
| Mean (SD)                                          | 291 (394)           | 406 (539)           | 314 (402)            | 428 (402)            | 211 (72.9)           | 363 (358)           | 0.335       |
| Median [Min, Max]                                  | 120 [5.13, 2070]    | 149 [27.7, 2270]    | 162 [40.0, 1100]     | 329 [20.7, 1300]     | 211 [159, 262]       | 289 [18.3, 1820]    |             |
| <b><sup>IM</sup>CD8 density (/mm<sup>2</sup>)</b>  |                     |                     |                      |                      |                      |                     |             |
| Mean (SD)                                          | 525 (433)           | 511 (460)           | 467 (342)            | 645 (506)            | 434 (52.2)           | 473 (396)           | 0.904       |
| Median [Min, Max]                                  | 350 [31.9, 2340]    | 350 [99.0, 2020]    | 407 [122, 1110]      | 482 [56.3, 1890]     | 434 [397, 471]       | 346 [23.6, 1690]    |             |

**Supplementary Table S5:** Association analysis between peripheral or intratumoral biomarkers measures and Extranodal extension (ENE). P values estimated by Wilcoxon test.

|                                                    | ENE No<br>(N=140)   | ENE Yes<br>(N=42)   | P-value |
|----------------------------------------------------|---------------------|---------------------|---------|
| <b>WBC (10<sup>9</sup>/L)</b>                      |                     |                     |         |
| Mean (SD)                                          | 7.35 (1.97)         | 7.62 (1.86)         | 0.221   |
| Median [Min, Max]                                  | 7.27 [2.77, 13.0]   | 7.69 [2.84, 13.7]   |         |
| <b>Lymphocytes (10<sup>9</sup>/L)</b>              |                     |                     |         |
| Mean (SD)                                          | 1.81 (0.519)        | 1.84 (0.592)        | 0.879   |
| Median [Min, Max]                                  | 1.79 [0.690, 3.54]  | 1.75 [0.890, 3.69]  |         |
| <b>Neutrophils (10<sup>9</sup>/L)</b>              |                     |                     |         |
| Mean (SD)                                          | 4.73 (1.67)         | 4.99 (1.57)         | 0.181   |
| Median [Min, Max]                                  | 4.46 [1.04, 10.1]   | 5.10 [1.59, 10.0]   |         |
| <b>Monocytes (10<sup>9</sup>/L)</b>                |                     |                     |         |
| Mean (SD)                                          | 0.583 (0.247)       | 0.589 (0.170)       | 0.369   |
| Median [Min, Max]                                  | 0.540 [0.200, 1.53] | 0.580 [0.160, 1.06] |         |
| <b>PLT (10<sup>9</sup>/L)</b>                      |                     |                     |         |
| Mean (SD)                                          | 233 (70.9)          | 212 (58.0)          | 0.178   |
| Median [Min, Max]                                  | 221 [60.0, 431]     | 220 [51.0, 312]     |         |
| <b>NLR (10<sup>9</sup>/L)</b>                      |                     |                     |         |
| Mean (SD)                                          | 2.78 (1.29)         | 2.98 (1.36)         | 0.345   |
| Median [Min, Max]                                  | 2.51 [0.799, 7.55]  | 2.67 [1.07, 7.08]   |         |
| <b>PLR (10<sup>9</sup>/L)</b>                      |                     |                     |         |
| Mean (SD)                                          | 137 (52.4)          | 125 (53.0)          | 0.076   |
| Median [Min, Max]                                  | 131 [31.1, 315]     | 111 [53.1, 273]     |         |
| <b><sup>TOT</sup>CD8 density (/mm<sup>2</sup>)</b> |                     |                     |         |
| Mean (SD)                                          | 424 (421)           | 397 (340)           | 0.869   |
| Median [Min, Max]                                  | 279 [16.4, 2180]    | 295 [22.2, 1440]    |         |
| <b><sup>CT</sup>CD8 density (/mm<sup>2</sup>)</b>  |                     |                     |         |
| Mean (SD)                                          | 329 (424)           | 345 (347)           | 0.225   |
| Median [Min, Max]                                  | 156 [5.13, 2270]    | 271 [18.3, 1820]    |         |
| <b><sup>IM</sup>CD8 density (/mm<sup>2</sup>)</b>  |                     |                     |         |
| Mean (SD)                                          | 536 (442)           | 465 (379)           | 0.391   |
| Median [Min, Max]                                  | 384 [31.9, 2340]    | 403 [23.6, 1690]    |         |

**Supplementary Table S6:** Association analysis between peripheral or intratumoral biomarkers measures and grading. P values estimated by Kruskal-Wallis test.

|                                         | G3<br>(N=77)        | G2<br>(N=87)        | G1<br>(N=18)        | P-value |
|-----------------------------------------|---------------------|---------------------|---------------------|---------|
| <b>WBC (10<sup>9</sup>/L)</b>           |                     |                     |                     |         |
| Mean (SD)                               | 7.54 (2.09)         | 7.34 (1.84)         | 7.23 (1.84)         | 0.738   |
| Median [Min, Max]                       | 7.58 [2.77, 13.7]   | 7.19 [4.03, 12.0]   | 7.27 [3.41, 11.1]   |         |
| <b>Lymphocytes (10<sup>9</sup>/L)</b>   |                     |                     |                     |         |
| Mean (SD)                               | 1.82 (0.556)        | 1.81 (0.543)        | 1.85 (0.423)        | 0.901   |
| Median [Min, Max]                       | 1.80 [0.750, 3.69]  | 1.72 [0.690, 3.54]  | 1.83 [1.23, 2.71]   |         |
| <b>Neutrophils (10<sup>9</sup>/L)</b>   |                     |                     |                     |         |
| Mean (SD)                               | 4.90 (1.74)         | 4.74 (1.55)         | 4.55 (1.74)         | 0.557   |
| Median [Min, Max]                       | 4.92 [1.04, 10.1]   | 4.46 [2.22, 8.74]   | 4.09 [1.57, 8.90]   |         |
| <b>Monocytes (10<sup>9</sup>/L)</b>     |                     |                     |                     |         |
| Mean (SD)                               | 0.578 (0.208)       | 0.577 (0.229)       | 0.651 (0.322)       | 0.779   |
| Median [Min, Max]                       | 0.570 [0.160, 1.03] | 0.540 [0.200, 1.45] | 0.530 [0.320, 1.53] |         |
| <b>PLT (10<sup>9</sup>/L)</b>           |                     |                     |                     |         |
| Mean (SD)                               | 231 (73.6)          | 223 (62.0)          | 241 (77.5)          | 0.481   |
| Median [Min, Max]                       | 233 [51.0, 397]     | 218 [89.0, 412]     | 220 [126, 431]      |         |
| <b>NLR (10<sup>9</sup>/L)</b>           |                     |                     |                     |         |
| Mean (SD)                               | 2.91 (1.37)         | 2.82 (1.23)         | 2.53 (1.40)         | 0.3     |
| Median [Min, Max]                       | 2.54 [0.897, 7.08]  | 2.60 [0.799, 7.55]  | 2.14 [1.11, 6.14]   |         |
| <b>PLR (10<sup>9</sup>/L)</b>           |                     |                     |                     |         |
| Mean (SD)                               | 136 (57.1)          | 132 (47.3)          | 135 (59.7)          | 0.966   |
| Median [Min, Max]                       | 126 [31.1, 308]     | 130 [36.5, 315]     | 123 [60.3, 297]     |         |
| <b>TOTCD8 density (/mm<sup>2</sup>)</b> |                     |                     |                     |         |
| Mean (SD)                               | 404 (370)           | 435 (456)           | 395 (249)           | 0.613   |
| Median [Min, Max]                       | 294 [18.6, 2180]    | 231 [16.4, 2180]    | 351 [42.2, 996]     |         |
| <b>CTCD8 density (/mm<sup>2</sup>)</b>  |                     |                     |                     |         |
| Mean (SD)                               | 322 (392)           | 358 (446)           | 261 (243)           | 0.917   |
| Median [Min, Max]                       | 191 [5.13, 2270]    | 152 [8.38, 2070]    | 235 [22.0, 899]     |         |
| <b>IMCD8 density (/mm<sup>2</sup>)</b>  |                     |                     |                     |         |
| Mean (SD)                               | 516 (402)           | 513 (463)           | 573 (379)           | 0.477   |
| Median [Min, Max]                       | 420 [23.6, 2020]    | 305 [23.6, 2340]    | 481 [95.8, 1260]    |         |

**Supplementary Table S7:** Association analysis between peripheral or intratumoral biomarkers measures and bone invasion. P values estimated by Kruskal-Wallis test.

|                                         | No bone invasion<br>(N=148) | Cortical invasion<br>(N=16) | Medullary invasion<br>(N=18) | P-value |
|-----------------------------------------|-----------------------------|-----------------------------|------------------------------|---------|
| <b>WBC (10<sup>9</sup>/L)</b>           |                             |                             |                              |         |
| Mean (SD)                               | 7.41 (1.97)                 | 7.08 (2.13)                 | 7.76 (1.56)                  | 0.378   |
| Median [Min, Max]                       | 7.43 [2.77, 13.7]           | 6.51 [4.67, 13.0]           | 7.62 [4.71, 10.7]            |         |
| <b>Lymphocytes (10<sup>9</sup>/L)</b>   |                             |                             |                              |         |
| Mean (SD)                               | 1.83 (0.562)                | 1.81 (0.492)                | 1.76 (0.316)                 | 0.92    |
| Median [Min, Max]                       | 1.79 [0.690, 3.69]          | 1.71 [1.03, 2.71]           | 1.72 [1.31, 2.32]            |         |
| <b>Neutrophils (10<sup>9</sup>/L)</b>   |                             |                             |                              |         |
| Mean (SD)                               | 4.77 (1.64)                 | 4.55 (1.89)                 | 5.15 (1.48)                  | 0.341   |
| Median [Min, Max]                       | 4.78 [1.04, 10.0]           | 3.81 [2.48, 10.1]           | 5.16 [2.58, 7.74]            |         |
| <b>Monocytes (10<sup>9</sup>/L)</b>     |                             |                             |                              |         |
| Mean (SD)                               | 0.589 (0.226)               | 0.544 (0.309)               | 0.588 (0.196)                | 0.41    |
| Median [Min, Max]                       | 0.565 [0.160, 1.45]         | 0.520 [0.240, 1.53]         | 0.550 [0.220, 1.09]          |         |
| <b>PLT (10<sup>9</sup>/L)</b>           |                             |                             |                              |         |
| Mean (SD)                               | 223 (63.6)                  | 228 (67.7)                  | 273 (92.7)                   | 0.056   |
| Median [Min, Max]                       | 220 [51.0, 431]             | 219 [126, 341]              | 278 [89.0, 412]              |         |
| <b>NLR (10<sup>9</sup>/L)</b>           |                             |                             |                              |         |
| Mean (SD)                               | 2.84 (1.36)                 | 2.57 (1.11)                 | 3.00 (1.05)                  | 0.46    |
| Median [Min, Max]                       | 2.53 [0.799, 7.55]          | 2.31 [1.23, 5.59]           | 3.15 [1.32, 5.38]            |         |
| <b>PLR (10<sup>9</sup>/L)</b>           |                             |                             |                              |         |
| Mean (SD)                               | 132 (52.6)                  | 128 (42.1)                  | 157 (58.5)                   | 0.084   |
| Median [Min, Max]                       | 125 [31.1, 308]             | 118 [80.8, 202]             | 156 [59.3, 315]              |         |
| <b>TOTCD8 density (/mm<sup>2</sup>)</b> |                             |                             |                              |         |
| Mean (SD)                               | 425 (399)                   | 271 (224)                   | 485 (529)                    | 0.344   |
| Median [Min, Max]                       | 279 [16.4, 2180]            | 170 [31.0, 724]             | 396 [42.2, 2180]             |         |
| <b>CTCD8 density (/mm<sup>2</sup>)</b>  |                             |                             |                              |         |
| Mean (SD)                               | 331 (400)                   | 224 (234)                   | 445 (548)                    | 0.56    |
| Median [Min, Max]                       | 170 [5.13, 2070]            | 108 [17.5, 799]             | 344 [22.0, 2270]             |         |
| <b>IMCD8 density (/mm<sup>2</sup>)</b>  |                             |                             |                              |         |
| Mean (SD)                               | 527 (420)                   | 416 (299)                   | 555 (585)                    | 0.613   |
| Median [Min, Max]                       | 396 [23.6, 2340]            | 340 [59.8, 912]             | 402 [56.3, 2020]             |         |

**Supplementary Table S8:** Association analysis between peripheral or intratumoral biomarkers measures and perineural invasion (PNI). P values estimated by Wilcoxon test.

|                                                    | No<br>(N=92)        | Yes<br>(N=90)       | P-value |
|----------------------------------------------------|---------------------|---------------------|---------|
| <b>WBC (10<sup>9</sup>/L)</b>                      |                     |                     |         |
| Mean (SD)                                          | 7.23 (1.98)         | 7.60 (1.89)         | 0.277   |
| Median [Min, Max]                                  | 7.22 [2.77, 12.6]   | 7.50 [4.16, 13.7]   |         |
| <b>Lymphocytes (10<sup>9</sup>/L)</b>              |                     |                     |         |
| Mean (SD)                                          | 1.81 (0.541)        | 1.82 (0.533)        | 0.831   |
| Median [Min, Max]                                  | 1.79 [0.690, 3.43]  | 1.76 [0.890, 3.69]  |         |
| <b>Neutrophils (10<sup>9</sup>/L)</b>              |                     |                     |         |
| Mean (SD)                                          | 4.61 (1.62)         | 4.98 (1.66)         | 0.208   |
| Median [Min, Max]                                  | 4.46 [1.04, 8.74]   | 4.84 [2.22, 10.1]   |         |
| <b>Monocytes (10<sup>9</sup>/L)</b>                |                     |                     |         |
| Mean (SD)                                          | 0.589 (0.251)       | 0.580 (0.210)       | 0.891   |
| Median [Min, Max]                                  | 0.545 [0.160, 1.53] | 0.560 [0.220, 1.33] |         |
| <b>PLT (10<sup>9</sup>/L)</b>                      |                     |                     |         |
| Mean (SD)                                          | 226 (68.2)          | 230 (69.2)          | 0.586   |
| Median [Min, Max]                                  | 218 [51.0, 399]     | 231 [60.0, 431]     |         |
| <b>NLR (10<sup>9</sup>/L)</b>                      |                     |                     |         |
| Mean (SD)                                          | 2.72 (1.26)         | 2.94 (1.35)         | 0.26    |
| Median [Min, Max]                                  | 2.48 [0.799, 7.25]  | 2.62 [1.07, 7.55]   |         |
| <b>PLR (10<sup>9</sup>/L)</b>                      |                     |                     |         |
| Mean (SD)                                          | 133 (53.1)          | 134 (52.5)          | 0.698   |
| Median [Min, Max]                                  | 127 [50.7, 308]     | 130 [31.1, 315]     |         |
| <b><sup>TOT</sup>CD8 density (/mm<sup>2</sup>)</b> |                     |                     |         |
| Mean (SD)                                          | 405 (396)           | 430 (412)           | 0.586   |
| Median [Min, Max]                                  | 250 [18.6, 2180]    | 300 [16.4, 2180]    |         |
| <b><sup>CT</sup>CD8 density (/mm<sup>2</sup>)</b>  |                     |                     |         |
| Mean (SD)                                          | 297 (344)           | 370 (461)           | 0.185   |
| Median [Min, Max]                                  | 127 [5.13, 1550]    | 193 [8.38, 2270]    |         |
| <b><sup>IM</sup>CD8 density (/mm<sup>2</sup>)</b>  |                     |                     |         |
| Mean (SD)                                          | 531 (448)           | 508 (410)           | 0.958   |
| Median [Min, Max]                                  | 398 [23.6, 2340]    | 377 [23.6, 2020]    |         |

**Supplementary Table S9:** Association analysis between peripheral or intratumoral biomarkers measures and lymphovascular invasion (LVI). P values estimated by Wilcoxon test.

|                                                    | LVI No<br>(N=130)   | LVI Yes<br>(N=52)   | P-value |
|----------------------------------------------------|---------------------|---------------------|---------|
| <b>WBC (10<sup>9</sup>/L)</b>                      |                     |                     |         |
| Mean (SD)                                          | 7.44 (2.00)         | 7.34 (1.79)         | 0.945   |
| Median [Min, Max]                                  | 7.31 [2.77, 13.0]   | 7.58 [4.03, 13.7]   |         |
| <b>Lymphocytes (10<sup>9</sup>/L)</b>              |                     |                     |         |
| Mean (SD)                                          | 1.84 (0.555)        | 1.75 (0.483)        | 0.407   |
| Median [Min, Max]                                  | 1.80 [0.690, 3.69]  | 1.76 [1.00, 2.86]   |         |
| <b>Neutrophils (10<sup>9</sup>/L)</b>              |                     |                     |         |
| Mean (SD)                                          | 4.77 (1.68)         | 4.83 (1.57)         | 0.704   |
| Median [Min, Max]                                  | 4.58 [1.04, 10.1]   | 4.94 [2.32, 10.0]   |         |
| <b>Monocytes (10<sup>9</sup>/L)</b>                |                     |                     |         |
| Mean (SD)                                          | 0.597 (0.248)       | 0.554 (0.181)       | 0.476   |
| Median [Min, Max]                                  | 0.555 [0.160, 1.53] | 0.545 [0.220, 1.06] |         |
| <b>PLT (10<sup>9</sup>/L)</b>                      |                     |                     |         |
| Mean (SD)                                          | 228 (72.0)          | 229 (59.7)          | 0.765   |
| Median [Min, Max]                                  | 220 [51.0, 431]     | 221 [118, 406]      |         |
| <b>NLR (10<sup>9</sup>/L)</b>                      |                     |                     |         |
| Mean (SD)                                          | 2.79 (1.33)         | 2.93 (1.25)         | 0.3     |
| Median [Min, Max]                                  | 2.48 [0.799, 7.25]  | 2.66 [1.07, 7.55]   |         |
| <b>PLR (10<sup>9</sup>/L)</b>                      |                     |                     |         |
| Mean (SD)                                          | 132 (52.1)          | 139 (54.3)          | 0.5     |
| Median [Min, Max]                                  | 125 [31.1, 315]     | 132 [60.3, 308]     |         |
| <b><sup>TOT</sup>CD8 density (/mm<sup>2</sup>)</b> |                     |                     |         |
| Mean (SD)                                          | 453 (433)           | 330 (301)           | 0.104   |
| Median [Min, Max]                                  | 298 [18.6, 2180]    | 237 [16.4, 1440]    |         |
| <b><sup>CT</sup>CD8 density (/mm<sup>2</sup>)</b>  |                     |                     |         |
| Mean (SD)                                          | 363 (446)           | 259 (273)           | 0.523   |
| Median [Min, Max]                                  | 176 [5.13, 2270]    | 164 [8.38, 1450]    |         |
| <b><sup>IM</sup>CD8 density (/mm<sup>2</sup>)</b>  |                     |                     |         |
| Mean (SD)                                          | 568 (460)           | 399 (308)           | 0.032   |
| Median [Min, Max]                                  | 438 [23.6, 2340]    | 317 [31.9, 1690]    |         |



**Supplementary Table S10:** Details of the loadings for each variable and level composing the 5 metavariables (<sup>MV</sup>).

| <b>IT-CD8<sup>MV</sup></b>   |                        | <b>IT-CD8<sup>MV</sup></b>   |                |
|------------------------------|------------------------|------------------------------|----------------|
|                              | <b>squared loading</b> |                              | <b>loading</b> |
| CD8 density Total            | 0.973                  | CD8 density Total            | 0.9866191      |
| CD8 density CT               | 0.862                  | CD8 density CT               | 0.9286171      |
| CD8 density IM               | 0.853                  | CD8 density IM               | 0.9237935      |
| Age                          | 0.097                  | Age                          | 0.3117396      |
| <b>NODAL<sup>MV</sup></b>    |                        | <b>NODAL<sup>MV</sup></b>    |                |
|                              | <b>squared loading</b> |                              | <b>loading</b> |
| pN VIII                      | 0.870                  | Nodal ratio                  | 0.8597471      |
| Nodal ratio                  | 0.739                  | Total Number Positive Nodes  | 0.8376385      |
| Total Number Positive Nodes  | 0.702                  | Differentiation=G1           | -0.83438891    |
| N0/N+                        | 0.661                  | pN VIII=pN0                  | -0.77263130    |
| ENE                          | 0.637                  | N0/N+=pN0                    | -0.76093557    |
| Treatment                    | 0.372                  | Treatment=Surgery            | -0.64286893    |
| LVI                          | 0.309                  | ENE=No                       | -0.43708058    |
| Differentiation              | 0.124                  | LVI=No                       | -0.35172077    |
| PNI                          | 0.095                  | PNI=No                       | -0.30449926    |
| Margins                      | 0.061                  | Margins=Negative             | -0.14653372    |
| <b>MYELOID<sup>MV</sup></b>  |                        | <b>MYELOID<sup>MV</sup></b>  |                |
|                              | <b>squared loading</b> |                              | <b>loading</b> |
| WBC                          | 0.91                   | Differentiation=G2           | -0.12520442    |
| Neutrophils                  | 0.85                   | Margins=Close                | -0.05056247    |
| Monocytes                    | 0.39                   | pN VIII=pN1                  | 0.01399685     |
| Sex                          | 0.16                   | Treatment=Surgery+RT         | 0.20589926     |
| <b>LYMPHOID<sup>MV</sup></b> |                        | <b>LYMPHOID<sup>MV</sup></b> |                |
|                              | <b>squared loading</b> |                              | <b>loading</b> |
| PLR                          | 0.85                   | PNI=Yes                      | 0.31126592     |
| NLR                          | 0.63                   | Differentiation=G3           | 0.33651668     |
| Lymphocytes                  | 0.55                   | pN VIII=pN2a                 | 0.44018873     |
| PLT                          | 0.14                   | Margins=Positive             | 0.52492533     |
| <b>TUMOR<sup>MV</sup></b>    |                        | <b>TUMOR<sup>MV</sup></b>    |                |
|                              | <b>squared loading</b> |                              | <b>loading</b> |
| Bone invasion                | 0.99                   | pN VIII=pN2b                 | 0.65695459     |
| pT VIII                      | 0.99                   | pN VIII=pN2c                 | 0.85813671     |
| <b>Gain in cohesion (%)</b>  | <b>46.85</b>           | N0/N+=pN+                    | 0.86836177     |
|                              |                        | Treatment=Surgery+CRT        | 0.87404470     |
|                              |                        | LVI=Yes                      | 0.87930191     |
|                              |                        | ENE=Yes                      | 1.4569353      |
|                              |                        | pN VIII=pN3b                 | 1.5517895      |
|                              |                        | <b>MYELOID<sup>MV</sup></b>  |                |
|                              |                        |                              | <b>loading</b> |
|                              |                        | WBC                          | 0.9548163      |
|                              |                        | Neutrophils                  | 0.9196095      |
|                              |                        | Monocytes                    | 0.6244274      |
|                              |                        | Sex=Female                   | -0.5241825     |
|                              |                        | Sex=Male                     | 0.3053933      |
|                              |                        | <b>LYMPHOID<sup>MV</sup></b> |                |
|                              |                        |                              | <b>loading</b> |
|                              |                        | PLR                          | 0.9242590      |
|                              |                        | NLR                          | 0.7958679      |
|                              |                        | Lymphocytes                  | -0.7388330     |
|                              |                        | PLT                          | 0.3775898      |
|                              |                        | <b>TUMOR<sup>MV</sup></b>    |                |
|                              |                        |                              | <b>loading</b> |
|                              |                        | pT VIII=pT2                  | -0.4853636     |
|                              |                        | pT VIII=pT1                  | -0.4853636     |
|                              |                        | Bone invasion=No             | -0.4769100     |
|                              |                        | pT VIII=pT3                  | -0.4558341     |
|                              |                        | Bone invasion=Cortical       | 1.9893744      |
|                              |                        | pT VIII=pT4                  | 2.1154294      |
|                              |                        | Bone invasion=Medullary      | 2.1529270      |

**Supplementary Table S11:** Extensive details of multivariable survival Cox proportional hazards models. Legend: d.f., degrees of freedom; Coefficient, regression coefficient; S.E., standard error.

| Overall Survival (OS) - Wald statistics                         |              |           |                  | Overall Survival (OS) - Model Details                         |             |         |
|-----------------------------------------------------------------|--------------|-----------|------------------|---------------------------------------------------------------|-------------|---------|
| Variable                                                        | Chi-Square   | d.f.      | P                | Term                                                          | Coefficient | S.E.    |
| MYELOID <sup>MV</sup>                                           | 3.09         | 1         | 0.0786           | MYELOID <sup>MV</sup>                                         | 0.1322      | 0.0752  |
| NODAL <sup>MV</sup>                                             | 34.00        | 3         | <.0001           | NODAL <sup>MV</sup>                                           | -0.3837     | 0.1320  |
| Nonlinear                                                       | 0.63         | 2         | 0.7306           | NODAL <sup>MV'</sup>                                          | 0.2290      | 0.2896  |
| IT-CD8 <sup>MV</sup>                                            | 1.06         | 1         | 0.3022           | NODAL <sup>MV''</sup>                                         | -17.252     | 22.966  |
| TUMOR <sup>MV</sup>                                             | 1.44         | 1         | 0.2303           | IT-CD8 <sup>MV</sup>                                          | -0.0800     | 0.0775  |
| LYMPHOID <sup>MV</sup>                                          | 10.26        | 3         | 0.0165           | TUMOR <sup>MV</sup>                                           | -0.0916     | 0.0763  |
| Nonlinear                                                       | 10.25        | 2         | 0.0059           | LYMPHOID <sup>MV</sup>                                        | -0.9900     | 0.3169  |
| <b>TOTAL NONLINEAR</b>                                          | <b>10.42</b> | <b>4</b>  | <b>0.0340</b>    | LYMPHOID <sup>MV'</sup>                                       | 46.362      | 15.525  |
| <b>TOTAL</b>                                                    | <b>41.31</b> | <b>9</b>  | <b>&lt;.0001</b> | LYMPHOID <sup>MV''</sup>                                      | -132.165    | 47.542  |
| Disease specific survival (DSS) - Wald statistics               |              |           |                  | Disease specific survival (DSS) - Model Details               |             |         |
| Variable                                                        | Chi-Square   | d.f.      | P                | Term                                                          | Coefficient | S.E.    |
| MYELOID <sup>MV</sup>                                           | 6.26         | 1         | 0.0123           | MYELOID <sup>MV</sup>                                         | 0.2389      | 0.0955  |
| NODAL <sup>MV</sup>                                             | 40.90        | 3         | <.0001           | NODAL <sup>MV</sup>                                           | -0.4373     | 0.1444  |
| Nonlinear                                                       | 1.01         | 2         | 0.6024           | NODAL <sup>MV'</sup>                                          | 0.2302      | 0.3432  |
| IT-CD8 <sup>MV</sup>                                            | 0.72         | 1         | 0.3956           | NODAL <sup>MV''</sup>                                         | -26.953     | 29.459  |
| TUMOR <sup>MV</sup>                                             | 1.93         | 1         | 0.1651           | IT-CD8 <sup>MV</sup>                                          | -0.0766     | 0.0902  |
| LYMPHOID <sup>MV</sup>                                          | 7.74         | 3         | 0.0516           | TUMOR <sup>MV</sup>                                           | -0.1247     | 0.0898  |
| Nonlinear                                                       | 7.64         | 2         | 0.0220           | LYMPHOID <sup>MV</sup>                                        | -0.9734     | 0.3971  |
| <b>TOTAL NONLINEAR</b>                                          | <b>8.34</b>  | <b>4</b>  | <b>0.0800</b>    | LYMPHOID <sup>MV'</sup>                                       | 52.910      | 19.297  |
| <b>TOTAL</b>                                                    | <b>48.11</b> | <b>9</b>  | <b>&lt;.0001</b> | LYMPHOID <sup>MV''</sup>                                      | -166.010    | 60.157  |
| Locoregional recurrence free survival (LRRFS) - Wald statistics |              |           |                  | Locoregional recurrence free survival (LRRFS) - Model Details |             |         |
| Variable                                                        | Chi-Square   | d.f.      | P                | Term                                                          | Coefficient | S.E.    |
| MYELOID <sup>MV</sup>                                           | 11.69        | 3         | 0.0085           | MYELOID <sup>MV</sup>                                         | 0.8172      | 0.4655  |
| Nonlinear                                                       | 2.87         | 2         | 0.2384           | MYELOID <sup>MV'</sup>                                        | -14.469     | 0.9600  |
| NODAL <sup>MV</sup>                                             | 20.42        | 3         | 0.0001           | MYELOID <sup>MV''</sup>                                       | 70.322      | 42.615  |
| Nonlinear                                                       | 5.03         | 2         | 0.0809           | NODAL <sup>MV</sup>                                           | -0.3942     | 0.1565  |
| IT-CD8 <sup>MV</sup>                                            | 0.01         | 1         | 0.9179           | NODAL <sup>MV'</sup>                                          | 0.5845      | 0.3373  |
| TUMOR <sup>MV</sup>                                             | 4.58         | 1         | 0.0323           | NODAL <sup>MV''</sup>                                         | -59.482     | 27.493  |
| LYMPHOID <sup>MV</sup>                                          | 0.31         | 1         | 0.5758           | IT-CD8 <sup>MV</sup>                                          | -0.0080     | 0.0772  |
| <b>TOTAL NONLINEAR</b>                                          | <b>7.24</b>  | <b>4</b>  | <b>0.1240</b>    | TUMOR <sup>MV</sup>                                           | -0.1742     | 0.0814  |
| <b>TOTAL</b>                                                    | <b>32.98</b> | <b>9</b>  | <b>0.0001</b>    | LYMPHOID <sup>MV</sup>                                        | 0.0536      | 0.0958  |
| Distant recurrence free survival (DRFS) - Wald statistics       |              |           |                  | Distant recurrence free survival (DRFS) - Model Details       |             |         |
| Variable                                                        | Chi-Square   | d.f.      | P                | Term                                                          | Coef        | S.E.    |
| MYELOID <sup>MV</sup>                                           | 2.78         | 1         | 0.0957           | MYELOID <sup>MV</sup>                                         | 0.2005      | 0.1203  |
| NODAL <sup>MV</sup>                                             | 31.40        | 3         | <.0001           | NODAL <sup>MV</sup>                                           | -0.6192     | 0.2106  |
| Nonlinear                                                       | 0.69         | 2         | 0.7080           | NODAL <sup>MV'</sup>                                          | 0.3937      | 0.5101  |
| IT-CD8 <sup>MV</sup>                                            | 9.62         | 3         | 0.0221           | NODAL <sup>MV''</sup>                                         | -37.339     | 44.941  |
| Nonlinear                                                       | 5.85         | 2         | 0.0537           | IT-CD8 <sup>MV</sup>                                          | -24.305     | 10.371  |
| TUMOR <sup>MV</sup>                                             | 0.07         | 1         | 0.7944           | IT-CD8 <sup>MV'</sup>                                         | 212.985     | 127.036 |
| LYMPHOID <sup>MV</sup>                                          | 11.92        | 3         | 0.0077           | IT-CD8 <sup>MV''</sup>                                        | -370.310    | 233.995 |
| Nonlinear                                                       | 11.22        | 2         | 0.0037           | TUMOR <sup>MV</sup>                                           | 0.0381      | 0.1462  |
| <b>TOTAL NONLINEAR</b>                                          | <b>17.74</b> | <b>6</b>  | <b>0.0069</b>    | LYMPHOID <sup>MV</sup>                                        | -17.050     | 0.4968  |
| <b>TOTAL</b>                                                    | <b>41.19</b> | <b>11</b> | <b>&lt;.0001</b> | LYMPHOID <sup>MV'</sup>                                       | 86.064      | 26.509  |
|                                                                 |              |           |                  | LYMPHOID <sup>MV''</sup>                                      | -257.221    | 83.674  |
